# Supplementary material for: Screening of Native Trichoderma Species for Nickel and Copper Bioremediation Potential Determined by FTIR and XRF
Source: MDPI journal article supplement (doi:10.3390/microorganisms11030815), 2023-03-22
Supplement: s1 [file s1]

## Supplementary Materials

**Table S1.** Morphological characteristics of *Trichoderma* spp. under different concentrations Cu and Ni.

|                                             | Treat-ments | Phialide length (μm)      |                          | Phialide width (μm)      |                          | Conidia length (μm)       | Conidia width (μm)       |
|---------------------------------------------|-------------|---------------------------|--------------------------|--------------------------|--------------------------|---------------------------|--------------------------|
|                                             |             | Apical phialide           | Lateral phialide         | Apical phialide          | Lateral phialide         |                           |                          |
| 20696<br><i>Trichoderma harzianum</i>       | Control     | 8.98 ± 2.00 <sup>a</sup>  | 6.72 ± 0.73 <sup>a</sup> | 2.49 ± 0.04 <sup>a</sup> | 2.77 ± 0.22 <sup>a</sup> | 2.87 ± 0.30 <sup>b</sup>  | 2.47 ± 0.39 <sup>a</sup> |
|                                             | 60 mg/L Cu  | 11.21 ± 3.46 <sup>a</sup> | 6.70 ± 1.17 <sup>a</sup> | 2.99 ± 0.42 <sup>a</sup> | 3.13 ± 0.49 <sup>a</sup> | 3.01 ± 0.13 <sup>b</sup>  | 2.78 ± 0.08 <sup>a</sup> |
|                                             | 120 mg/L Cu | 9.94 ± 1.58 <sup>a</sup>  | 5.54 ± 0.71 <sup>a</sup> | 2.15 ± 0.11 <sup>a</sup> | 2.89 ± 0.32 <sup>a</sup> | 2.87 ± 0.25 <sup>b</sup>  | 2.38 ± 0.19 <sup>a</sup> |
| 20660<br><i>Trichoderma harzianum</i>       | Control     | 10.12 ± 2.77 <sup>a</sup> | 5.57 ± 0.85 <sup>a</sup> | 2.37 ± 0.38 <sup>a</sup> | 2.98 ± 0.38 <sup>a</sup> | 2.72 ± 0.30 <sup>b</sup>  | 2.31 ± 0.23 <sup>a</sup> |
|                                             | 60 mg/L Cu  | 11.28 ± 2.54 <sup>a</sup> | 6.39 ± 0.59 <sup>a</sup> | 2.29 ± 0.33 <sup>a</sup> | 3.00 ± 0.28 <sup>a</sup> | 2.93 ± 0.35 <sup>b</sup>  | 2.48 ± 0.22 <sup>a</sup> |
|                                             | 120 mg/L Cu | 10.03 ± 3.16 <sup>a</sup> | 6.26 ± 0.67 <sup>a</sup> | 2.22 ± 0.21 <sup>a</sup> | 2.84 ± 0.21 <sup>a</sup> | 3.00 ± 0.31 <sup>b</sup>  | 2.42 ± 0.19 <sup>a</sup> |
| 20664<br><i>Trichoderma longibrachiatum</i> | Control     | 7.83 ± 1.48 <sup>a</sup>  |                          | 2.53 ± 0.21 <sup>a</sup> |                          | 3.90 ± 0.16 <sup>a</sup>  | 2.48 ± 0.24 <sup>a</sup> |
|                                             | 60 mg/L Ni  | 8.06 ± 0.54 <sup>a</sup>  |                          | 2.81 ± 0.37 <sup>a</sup> |                          | 3.94 ± 0.47 <sup>a</sup>  | 2.45 ± 0.15 <sup>a</sup> |
|                                             | 120 mg/L Ni | 7.87 ± 1.57 <sup>a</sup>  |                          | 2.61 ± 0.16 <sup>a</sup> |                          | 3.85 ± 0.33 <sup>a</sup>  | 2.49 ± 0.21 <sup>a</sup> |
| 22669<br><i>Trichoderma longibrachiatum</i> | Control     | 8.11 ± 1.70 <sup>a</sup>  |                          | 2.64 ± 0.25 <sup>a</sup> |                          | 4.14 ± 0.42 <sup>a</sup>  | 2.39 ± 0.25 <sup>a</sup> |
|                                             | 60 mg/L Ni  | 7.91 ± 1.57 <sup>a</sup>  |                          | 2.71 ± 0.23 <sup>a</sup> |                          | 4.26 ± 0.50 <sup>a</sup>  | 2.36 ± 0.14 <sup>a</sup> |
|                                             | 120 mg/L Ni | 8.28 ± 0.96 <sup>a</sup>  |                          | 2.66 ± 0.18 <sup>a</sup> |                          | 4.29 ± 0.56 <sup>a</sup>  | 2.48 ± 0.18 <sup>a</sup> |
| 22665<br><i>Trichoderma longibrachiatum</i> | Control     | 6.18 ± 1.02 <sup>a</sup>  |                          | 2.34 ± 0.33 <sup>a</sup> |                          | 3.35 ± 0.31 <sup>ab</sup> | 2.54 ± 0.27 <sup>a</sup> |
|                                             | 1mmol Ni    | 6.46 ± 1.40 <sup>a</sup>  |                          | 2.73 ± 0.39 <sup>a</sup> |                          | 3.22 ± 0.31 <sup>ab</sup> | 2.66 ± 0.37 <sup>a</sup> |
|                                             | 2mmol Ni    | 5.65 ± 2.31 <sup>a</sup>  |                          | 2.78 ± 0.26 <sup>a</sup> |                          | 3.20 ± 0.23 <sup>ab</sup> | 2.68 ± 0.36 <sup>a</sup> |

The statistical data were analyzed with the use of the one-way ANOVA and Tukey's post hoc tests and a statistically significant difference (p-value < 0.05) is denoted by a different letter in the table.
